# Supplementary material for: Complete Chloroplast Genome Sequence of Triosteum sinuatum, Insights into Comparative Chloroplast Genomics, Divergence Time Estimation and Phylogenetic Relationships among Dipsacales
Source: Genes (Basel). 2022 May 23;13(5):933. doi: 10.3390/genes13050933 (PMC9141360; doi:10.3390/genes13050933)
Supplement: Supplementary file 1 [file genes-13-00933-s001.zip]

Archive with 4 entries (4 files):
- Figure S1.jpg
- Figure S2.png
- Figure S3.png
- Title of Figures S1-S3.pdf
